# Supplementary material for: An obstructive role of NK cells on metastatic growth of clear-cell sarcoma cells in a xenoplant murine model
Source: PubMed Central journal article supplement — Mol Clin Oncol. 2020 Nov 12;14(1):9. doi: 10.3892/mco.2020.2171 (PMC7690248; doi:10.3892/mco.2020.2171), 2020-11-12

Figure S1. Body weights of SCID-Beige mice transplanted with HS-MM cells. NK, natural killer.

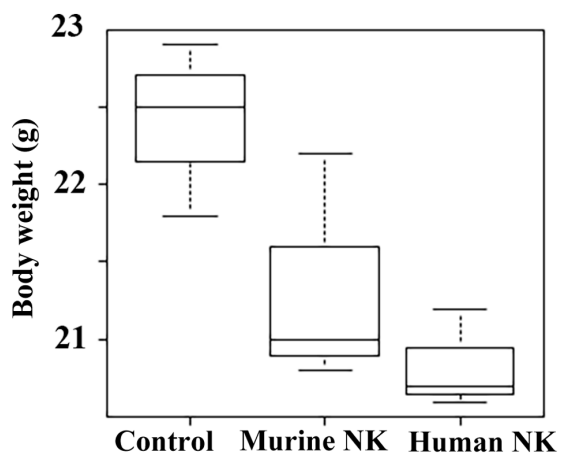

Figure S2. Representative images of the histopathological examination of tumors at the primary injection site in mice (A) transplanted with natural killer cells or (B) were treated with anti-CD96 antibody compared to the (C) control mouse. No histopathological differences among the different groups were observed. Scale bar, 100  $\mu$ m.

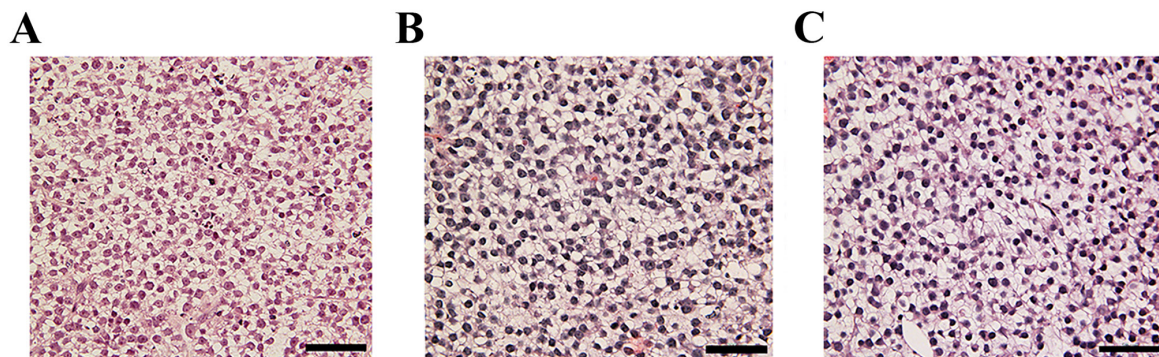

Supplement: Supplementary_Data.pdf [file Supplementary_Data.pdf]
